# Supplementary material
Source: publisher figshare collection journal article supplement (https://acs.figshare.com/ndownloader/files/4164994)
Supplement: Supplementary file 1 [file 4164994]

## Supporting Information for:

### Enzyme microheterogeneous hydration and stabilization in supercritical carbon dioxide

Rodrigo L. Silveira,<sup>a</sup> Julian Martínez,<sup>b</sup> Munir S. Skaf,<sup>a,\*</sup> and Leandro Martínez<sup>c,\*</sup>

<sup>a</sup>Institute of Chemistry, State University of Campinas, Campinas, SP, Brazil.

<sup>b</sup>Faculty of Food Engineering, State University of Campinas, Campinas, SP, Brazil.

<sup>c</sup>Institute of Physics of São Carlos, University of São Paulo, São Carlos, SP, Brazil.

\*Corresponding authors. E-mail: [skaf@iqm.unicamp.br](mailto:skaf@iqm.unicamp.br) (MS), [leandro@ifsc.usp.br](mailto:leandro@ifsc.usp.br) (LM).

**Content:** Supplemental figures S1 and S2:

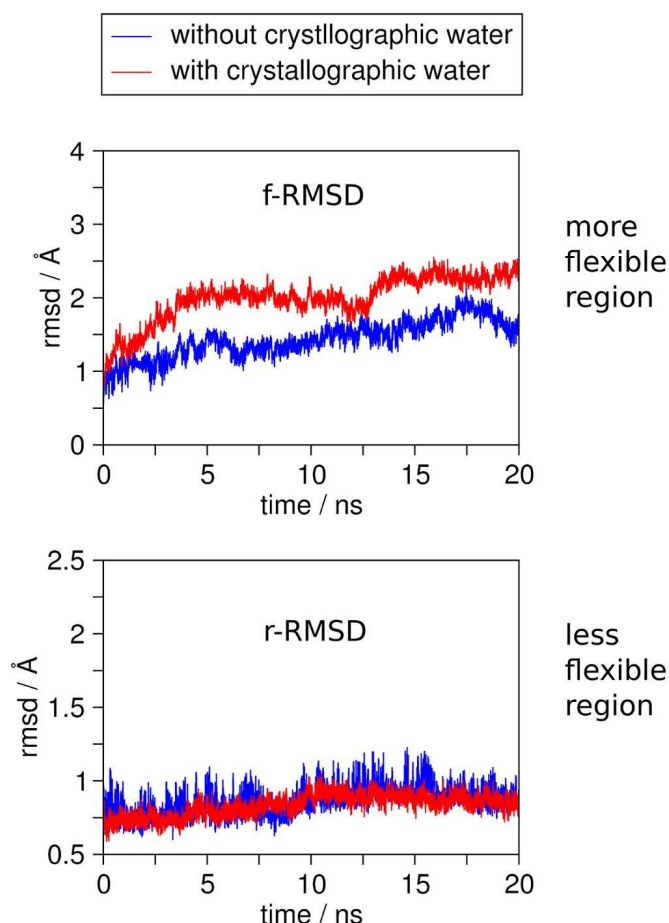

**Figure S1:** RMSD of CALB immersed in water at 328.15 K and 100 bar. Results are shown for r-RMSD and f-RMSD (see main text for definition) for simulations with and without the crystallographic water molecules in the initial configuration. The result shows that the deviations are modest and similar, suggesting that the high structure deviations observed in pure scCO<sub>2</sub> (main text, Figs. 2 and 3) do not result from removal of structural waters only.

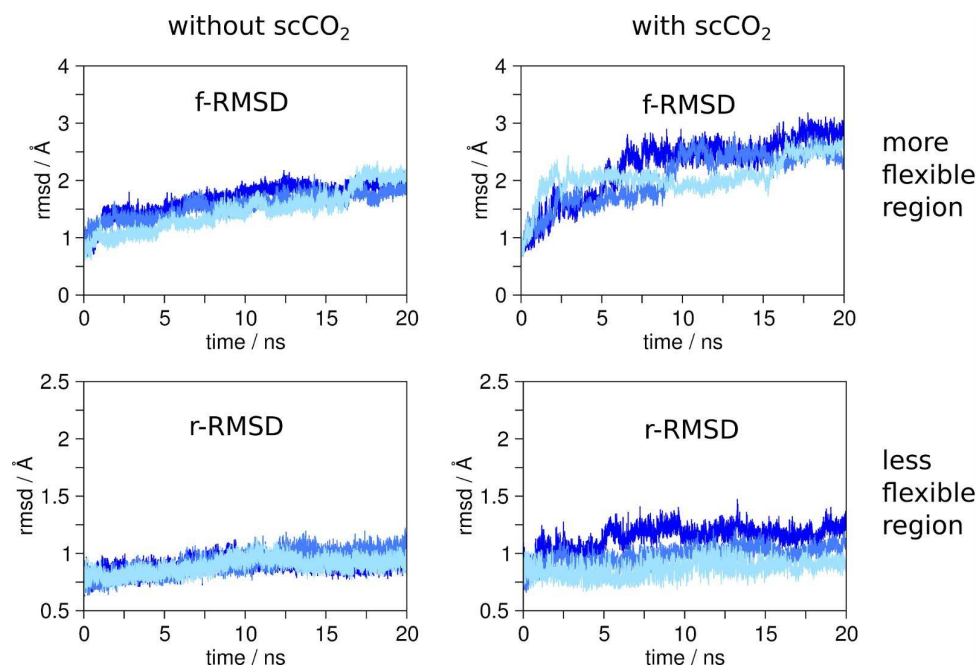

**Figure S2:** RMSD of CALB plus crystallographic water in vacuum and immersed in scCO<sub>2</sub> at 328.15 K and 100 bar. Results are shown for r-RMSD and f-RMSD (see main text for definition) for simulations with and without the crystallographic water molecules in the initial configuration. The result shows that the presence of scCO<sub>2</sub> enhances the flexibility of the more flexible parts of the protein, whereas no significant effect is noticed in the less flexible regions.
